# Supplementary material for: The interruption of Onchocerca volvulus and Wuchereria bancrofti transmission by integrated chemotherapy in the Obongi focus, North Western Uganda
Source: PLoS One. 2017 Dec 18;12(12):e0189306. doi: 10.1371/journal.pone.0189306 (PMC5734780; doi:10.1371/journal.pone.0189306)
Supplement: S2 Table — Shows the number of villages assessed in Moyo EU, number screened and the ICT results. (XLSX) [file pone.0189306.s002.xlsx]

## Sheet: Moyo1
TAS RESULTS: MOYO EVALUATION UNIT; COMMUNITY -August,2015
Serial No.	Subcounty	Village	Number Tested			ICT Positive
			Male	Female	Total	Number	%age
1	Aliba	Dilokota	21	32	53	0	0
2	Aliba	Acimari	30	28	58	0	0
3	Aliba	Indilinga	13	20	33	0	0
4	Aliba	Mbale North	26	26	52	0	0
5	Gimara	Rupo	25	18	43	0	0
6	Gimara	Madugua	32	16	48	0	0
7	Gimara	Liwa South	19	24	43	0	0
8	Gimara	Kenya	33	37	70	0	0
9	Itula	Kochi Boma	14	14	28	0	0
10	Itula	Dongo	15	18	33	0	0
11	Itula	Cinyi	20	11	31	0	0
12	Itula	Andra	15	18	33	0	0
13	Lefori	Lea	13	17	30	0	0
14	Lefori	Coloa West	29	33	62	0	0
15	Lefori	Gwere West	9	7	16	0	0
16	Lefori	Abirikaku	17	19	36	0	0
17	Moyo	Onyire	37	45	82	0	0
18	Moyo	Vura Opi	31	33	64	0	0
19	Moyo	Itia	24	31	55	0	0
20	Moyo	Moipi	30	20	50	0	0
21	Moyo	Madagascar	9	13	22	0	0
22	Moyo	Ramogi North	24	26	50	0	0
23	Moyo	Rede	16	23	39	0	0
24	Laropi	Ubbi South	28	31	59	0	0
25	Laropi	Pakoma East	19	13	32	0	0
26	Laropi	Pacoro	25	7	32	0	0
27	Laropi	Paaka	14	25	39	0	0
28	Dufile	Indridri	12	12	24	0	0
29	Dufile	Pamangara	11	11	22	0	0
30	Dufile	Ramogi South	11	11	22	0	0
31	Metu	Pamenyua	10	8	18	0	0
32	Metu	Cecelogo	6	6	12	0	0
33	Metu	Julukwe	9	14	23	0	0
34	Metu	Goopi East	17	8	25	0	0
35	Metu	Kweyo	18	19	37	0	0
36	Metu	Paleure/Pacunaki	9	9	18	0	0
37	Metu	Izzi	8	5	13	0	0
38	Metu	Aringa East	13	9	22	0	0
39	Metu	Pamulu	13	11	24	0	0
40	Metu	Paloburi	3	9	12	0	0
41	Moyo TC	Elenderea	20	24	44	0	0
42	Moyo TC	Central I	11	12	23	0	0
Total			759	773	1532	0	0

## Sheet: Adjun1
TAS RESULTS: ADJUMANI EVALUATION UNIT; COMMUNITY -August_Sept2015
Serial No.	Subcounty	Village	Number Tested			ICT Positive
			Male	Female	Total	Number	%age
1	Ukusijoni	Ayiri Central	33	31	64	0	0
2	Ukisijoni	Ndele	18	18	36	0	0
3	Itikirwa	Gbayi	23	31	54	0	0
4	Itikirwa	Kwoma	20	21	41	0	0
5	Itikirwa	Ozugo East	16	14	30	0	0
6	Ofua	Tianyu North	14	17	31	0	0
7	Ofua	Subbe Central	32	32	64	0	0
8	Ofua	Aliababa	23	12	35	0	0
9	Pakelle	Okawa	8	6	14	0	0
10	Pakelle	Liria	17	29	46	0	0
11	Pakelle	Ataboo "A"	48	47	95	0	0
12	Pakelle	Mundruangwa	17	6	23	0	0
13	Arinyapi	Elegu Central	16	16	32	0	0
14	Arinyapi	Elema	6	4	10	0	0
15	Arinyapi	Uvuvu West	15	15	30	0	0
16	Arinyapi	Onjanzo	10	9	19	0	0
17	Dzaipi	Pangirinya	31	24	55	0	0
18	Dzaipi	Leyia	23	15	38	0	0
19	Dzaipi	Ringa	26	23	49	0	0
20	Pachara	Kalamairo	34	20	54	0	0
21	Pachara	Agojo/Nyanimaci	13	20	33	0	0
22	Pachara	Russia West	42	48	90	0	0
23	Ciforo	Ukangali Central	23	33	56	0	0
24	Ciforo	Dubaju	10	12	22	0	0
25	Ciforo	Liri	46	40	86	0	0
26	Ciforo	Mocope	31	23	54	0	0
27	Adropi	Tamana	18	18	36	0	0
28	Adropi	Onzoo	16	12	28	0	0
29	Adropi	Moinya	14	14	28	0	0
30	Adjumani TC	Minia East	64	78	142	0	0
31	Adjumani TC	Molokpoda	41	43	84	0	0
32	Adjumani TC	Pavuraga	38	32	70	0	0
Total			786	763	1549	0	0
